# Supplementary material for: Causal Association and Shared Genetics Between Asthma and COVID-19
Source: Front Immunol. 2022 Mar 21;13:705379. doi: 10.3389/fimmu.2022.705379 (PMC8977836; doi:10.3389/fimmu.2022.705379)
Supplement: Supplementary file 2 [file Table_1.xlsx]

## Sheet: Sheet1
Supplementary Table 1. Cross-trait meta-analysis of COVID-19 hospitalization and asthma
P: the significance of the overall test-statistics that combined association signals from two directions; Pvalue.1 and Pvalue.2: the corresponding level of significance for each of the component one-sided test-statistics in the positive and negative directions.
No	SNP	CHR	BP	Gene	Trait	Pvalue.1	Pvalue.2	P
1	rs550057	9	136146597	ABO	Asthma	2.99E-08	1	1.33143e-12
2	rs554833	9	136147160	ABO	COVID-19 hospitalization	4.17E-05	7.12E-09	3.88479e-12
3	rs495203	9	136145240	ABO	COVID-19 hospitalization	7.04E-05	8.50E-09	3.90753e-12
4	rs545971	9	136143372	ABO	COVID-19 hospitalization	2.25E-05	6.18E-09	4.24494e-12
5	rs657152	9	136139265	ABO	COVID-19 hospitalization	2.05E-05	6.20E-09	8.85049e-12
6	rs643434	9	136142355	ABO	COVID-19 hospitalization	4.58E-08	9.15E-07	1.74345e-11
7	rs653178	12	112007756	ATXN2	Asthma	1.75E-05	7.21E-09	1.82661e-10
8	rs3184504	12	111884608	SH2B3	Asthma	9.95E-10	1	2.10211e-10
9	rs10860891	12	103014757	NA	COVID-19 hospitalization	3.42E-09	0.038	9.94947e-10
10	rs597808	12	111973358	ATXN2	Asthma	0.065	1.21E-10	1.58101e-09
11	rs11065979	12	112059557	NA	Asthma	1	2.33E-09	1.73561e-09
12	rs7137828	12	111932800	ATXN2	Asthma	0.124	9.60E-10	1.79302e-09
13	rs35350651	12	111907431	ATXN2	Asthma, COVID-19 hospitalization	4.94E-10	0.149	2.33036e-09
14	rs10774625	12	111910219	ATXN2	Asthma	0.188	3.43E-10	2.84235e-09
15	rs10774624	12	111833788	NA	Asthma	1.04E-10	0.066	3.06656e-09
16	rs11065987	12	112072424	NA	Asthma	0.247	2.88E-10	5.1208e-09
17	rs2660	12	113357442	OAS1	COVID-19 hospitalization	6.25E-10	0.353	5.42839e-09
18	rs11065991	12	112083162	BRAP	Asthma	0.333	1.12E-09	8.48536e-09
19	rs4766664	12	113362997	NA	COVID-19 hospitalization	0.256	1.81E-09	9.02726e-09
20	rs2013002	12	112200150	NA	Asthma	0.385	1.26E-09	1.04317e-08
21	rs11513729	12	112273499	NA	Asthma	0.667	1.27E-09	1.09203e-08
22	rs1859330	12	113376388	OAS3	COVID-19 hospitalization	0.615	2.96E-09	1.16095e-08
23	rs2269899	12	113381956	OAS3	COVID-19 hospitalization	1.78E-09	0.609	1.393e-08
24	rs10774679	12	113374748	OAS3	COVID-19 hospitalization	3.32E-09	0.650	1.43321e-08
25	rs10744791	12	113410316	OAS3	COVID-19 hospitalization	0.628	1.57E-09	1.45909e-08
26	rs1981555	12	113372977	NA	COVID-19 hospitalization	0.660	2.48E-09	1.82357e-08
27	rs17630235	12	112591686	TRAFD1	Asthma	0.045	2.02E-08	1.85485e-08
28	rs10735079	12	113380008	OAS3	COVID-19 hospitalization	0.174	6.12E-09	1.89059e-08
29	rs10774671	12	113357193	OAS1	COVID-19 hospitalization	0.037	6.32E-09	1.99964e-08
30	rs11066309	12	112883476	PTPN11	Asthma	0.043	4.84E-08	2.14294e-08
31	rs4767037	12	113372804	NA	COVID-19 hospitalization	0.038	4.25E-08	2.18446e-08
32	rs3759376	12	113373563	NA	COVID-19 hospitalization	0.032	4.87E-08	2.2047e-08
33	rs1131476	12	113357209	OAS1	COVID-19 hospitalization	0.037	4.66E-08	2.29905e-08
34	rs11066283	12	112840766	NA	Asthma	9.78E-09	0.041	2.34296e-08
35	rs4767045	12	113409413	OAS3	COVID-19 hospitalization	0.056	3.54E-08	2.55079e-08
36	rs3937434	12	113406196	OAS3	COVID-19 hospitalization	0.046	4.03E-08	2.55897e-08
37	rs7310667	12	113392182	OAS3	COVID-19 hospitalization	6.21E-08	0.038	2.63891e-08
38	rs2285932	12	113386950	OAS3	COVID-19 hospitalization	5.68E-08	0.038	2.70568e-08
39	rs3759375	12	113373588	NA	COVID-19 hospitalization	5.90E-08	0.040	2.71355e-08
40	rs1381383189	9	136138765	ABO	Asthma, COVID-19 hospitalization	5.61E-08	0.037	2.98607e-08
41	rs6489879	12	113377822	OAS3	COVID-19 hospitalization	3.28E-08	0.058	3.1081e-08
42	rs7311182	12	113379123	OAS3	COVID-19 hospitalization	1.77E-08	0.057	3.17311e-08
43	rs6489882	12	113381376	OAS3	COVID-19 hospitalization	0.046	1.80E-08	3.21065e-08
44	rs7132797	12	113375036	OAS3	COVID-19 hospitalization	2.01E-08	0.050	3.23957e-08
45	rs6489880	12	113380271	OAS3	COVID-19 hospitalization	2.11E-08	0.060	3.25633e-08
46	rs11066451	12	113361443	NA	COVID-19 hospitalization	0.030	2.17E-08	3.30588e-08
47	rs4767044	12	113402899	OAS3	COVID-19 hospitalization	2.45E-08	0.062	3.31167e-08
48	rs10744789	12	113396010	OAS3	COVID-19 hospitalization	0.060	3.54E-08	3.37491e-08
49	rs10774675	12	113361237	NA	COVID-19 hospitalization	0.054	9.57E-09	3.44319e-08
50	rs11066320	12	112906415	PTPN11	Asthma	0.057	2.55E-08	3.47258e-08
51	rs4238034	12	113397143	OAS3	COVID-19 hospitalization	2.60E-08	0.057	3.4861e-08
52	rs11066452	12	113361574	NA	COVID-19 hospitalization	0.057	1.51E-08	3.62992e-08
53	rs11066188	12	112610714	HECTD4	Asthma	0.057	2.67E-08	3.83903e-08
54	rs7134391	12	113366691	NA	COVID-19 hospitalization	0.061	2.47E-08	3.90194e-08
55	rs7966314	12	113372539	NA	COVID-19 hospitalization	0.029	2.17E-08	4.04648e-08
56	rs6489867	12	113363550	NA	COVID-19 hospitalization	1.19E-08	0.105	4.14783e-08
57	rs6489878	12	113368125	NA	COVID-19 hospitalization	4.89E-09	0.251	4.38665e-08
58	rs10850097	12	113361117	NA	COVID-19 hospitalization	7.50E-09	0.212	4.41944e-08
59	rs3815178	12	113376320	OAS3	COVID-19 hospitalization	8.08E-09	0.203	4.42483e-08
60	rs2384073	12	113367595	NA	COVID-19 hospitalization	0.134	1.16E-08	4.52057e-08
61	rs11066301	12	112871372	PTPN11	Asthma	9.88E-09	0.120	4.52254e-08
62	rs2384072	12	113367422	NA	COVID-19 hospitalization	0.124	9.56E-09	4.8845e-08
63	rs6489874	12	113367895	NA	COVID-19 hospitalization	0.104	6.37E-09	4.95201e-08
